# Supplementary material for: Comparative Transcriptome Profiling Provides Insights into Plant Salt Tolerance in Watermelon (Citrullus lanatus)
Source: Life (Basel). 2022 Jul 12;12(7):1033. doi: 10.3390/life12071033 (PMC9320501; doi:10.3390/life12071033)
Supplement: Supplementary file 1 [file life-12-01033-s001.zip]

Archive with 7 entries (7 files):
- supplementary Figure S1.pdf
- supplementary Figure S2.pdf
- supplementary table S1.xls
- supplementary table S2.xls
- supplementary table S3.xls
- supplementary table S4.xls
- supplementary table S5.xls
