# Supplementary material for: Comparative Transcriptome Profiling Provides Insights into Plant Salt Tolerance in Watermelon (Citrullus lanatus)
Source: Life (Basel). 2022 Jul 12;12(7):1033. doi: 10.3390/life12071033 (PMC9320501; doi:10.3390/life12071033)
Supplement: Supplementary file 1 [file life-12-01033-s001.zip › supplementary table S1.xls]

## Sheet: Sheet1
Table S1. Primers for q-PCR.
ID	Forward primer	Reverse primer
Cla97C09G167270	ATTAATTGCCACGGCGAAGG	GGAGAGTGATATTGCCACGC
Cla97C01G018360	TCTCTCCGACCACGACCATA	ATGAAGGCACGATCTGGGTC
Cla97C05G107320	TCGGATCCTGTCAAGCCAAG	CCTTTTCTGCGACCAACCCT
Cla97C06G127570	GAAGCCCAGAGGCTAAGGTG	AACCGCTTCAGCTAAACTGC
Cla97C06G109590	CCTTGACTCCAATGGTGATGG	GCCCACATTTTGTCCATCCAAG
Cla97C01G022320	TGCCGTCTTCGATGGACAAA	TCGTTGTCCGTTCTTCCTGG
Cla97C08G149800	GGTTGGGCAAAAACGAATGC	CACCGTGTGTGGAAGTGGAA
Cla97C10G205730	CACTTCGTAAAGAGCTGCCAC	AGGATGTGGTGTTCGTCGTC
Cla97C11G221050	GGTGTCAGAGGAGCCATCAA	AGGAGCGGCAAAGTTCTTCC
Cla97C09G168720	TTGCAGGCTAACGACAATGG	TGAGACTTCAACCACGACGC
Cla97C09G169250	TGGCTGGGAGTAATGAAGTCAA	AAACCCCATCCACCGGAATC
Actin	GAACTTGGCACCTGTCCTGT	GAACAGTGCAACAGCCTCAA
