# Supplementary material for: Comparative Transcriptome Profiling Provides Insights into Plant Salt Tolerance in Watermelon (Citrullus lanatus)
Source: Life (Basel). 2022 Jul 12;12(7):1033. doi: 10.3390/life12071033 (PMC9320501; doi:10.3390/life12071033)
Supplement: Supplementary file 1 [file life-12-01033-s001.zip › supplementary table S2.xls]

## Sheet: Sheet1
Table S2.Basic information about transcriptomic data
Sample	Total Raw Reads (M)	Total Clean Reads (M)	Total Clean Bases(Gb)	Clean Reads Q30(%)	Total Mapping(%)	Total Mapping(%)
SCL1	42.04	43.82	6.31	95.95	94.45	66.99
SCL2	41.66	43.3	6.25	96.21	94.34	69.23
SCL3	42.01	43.82	6.3	95.87	93.93	68.8
STL1	42.2	43.82	6.33	96.31	94.61	70.3
STL2	42.24	43.82	6.34	96.39	94.46	71.72
STL3	41.96	43.82	6.29	95.75	93.26	71.19
SCR1	42.93	45.57	6.44	94.19	91.42	66.78
SCR2	41.97	43.82	6.3	95.78	90.49	64.93
SCR3	42.05	43.82	6.31	95.97	92.34	68.62
STR1	42.13	43.82	6.32	96.13	93	68.56
STR2	42.33	43.82	6.35	96.59	83.72	61.2
STR3	42.45	43.82	6.37	96.88	90.93	69.75
TCL1	42.32	43.82	6.35	96.56	94.97	75.54
TCL2	40.66	42.18	6.1	96.4	94.99	74.77
TCL3	42.36	43.82	6.35	96.67	94.98	75.3
TTL1	41.97	43.82	6.3	95.77	94.01	69.42
TTL2	42.22	43.82	6.33	96.34	94.67	71.01
TTL3	42.45	43.82	6.37	96.86	94.66	69.36
TCR1	43.51	45.57	6.53	95.48	93.77	76.4
TCR2	42.01	43.82	6.3	95.86	93.63	76.11
TCR3	42.01	43.82	6.3	95.86	94.35	76.57
TTR1	42.21	43.82	6.33	96.33	93.73	75.35
TTR2	42.03	43.82	6.3	95.91	91.95	68.77
TTR3	42.35	43.82	6.35	96.64	93.81	70.13
