# Supplementary material for: Comparative Transcriptome Profiling Provides Insights into Plant Salt Tolerance in Watermelon (Citrullus lanatus)
Source: Life (Basel). 2022 Jul 12;12(7):1033. doi: 10.3390/life12071033 (PMC9320501; doi:10.3390/life12071033)
Supplement: Supplementary file 1 [file life-12-01033-s001.zip › supplementary table S3.xls]

## Sheet: Sheet1
Table S3. Expression of DEGs before salt stress in roots and leaves of salt-tolerant watermelon variety and salt-sensitive watermelon variety.
122 DEGs in roots						122 DEGs in leaves
Gene ID	SCR FPKM	TCR FPKM	STR FPKM	TTR FPKM		Gene ID	SCL FPKM	TCL FPKM	STL FPKM	TTL FPKM
BGI_novel_G000094	3.71333	5.88667	76.4967	24.6133		BGI_novel_G000093	0.846667	0.226667	6.01333	0.833333
BGI_novel_G000139	0.253333	1.02667	0.993333	2.58		BGI_novel_G000272	1.41667	2.93	5.89667	15.6933
BGI_novel_G000207	4.37667	0.526667	1.68	0		BGI_novel_G000273	0	1.61667	1.33	4.42
BGI_novel_G000299	0.636667	3.62	2.82667	18.45		BGI_novel_G000297	22.36	8.97333	103.677	29.3133
BGI_novel_G000429	0.833333	5.91667	0.07	1.82333		BGI_novel_G000337	12.6633	2.28667	0.89	0.08
BGI_novel_G000431	19.4833	72.8333	3.51	15.5533		BGI_novel_G000386	14.9767	5.54667	384.383	45.0833
Cla97C01G000640	16.12	26.5467	0.633333	3.03		BGI_novel_G000419	2.9	5.34333	5.45	9.25333
Cla97C01G007110	4.83333	17.6267	0.466667	3.12667		Cla97C00G000190	27.0867	5.15	15.7633	2.44667
Cla97C01G009200	3.52	7.98	6.67667	12.64		Cla97C00G000280	16.9067	36.38	4.67	21.3167
Cla97C01G011340	5.65667	17.1033	13.9067	59.8467		Cla97C01G001370	52.6	115.437	10.91	38.3233
Cla97C01G016350	24.6433	13.9033	39.7767	19.0367		Cla97C01G007200	94.07	326.52	40.3567	105.357
Cla97C01G019780	4.63667	16.5233	1.02667	4.34333		Cla97C01G008900	2.13333	9.83333	0.273333	2.17
Cla97C01G023130	7.35333	17.4867	43.56	93.2033		Cla97C01G010170	295.483	110.283	94.7333	16.7667
Cla97C01G024070	71.0333	37.0267	178.56	75.87		Cla97C01G012490	7.39	1.03667	1.71	0.12
Cla97C02G031490	9.37333	59.4	1.66	8.75667		Cla97C01G014260	218.44	41.5667	70.6233	6.45333
Cla97C02G037210	133.117	174.017	67.3067	125.253		Cla97C01G016620	39.5333	61.8933	16.3033	45.45
Cla97C02G039740	243.94	103.807	5.31	19.8867		Cla97C01G019160	4.34667	0.813333	1.13333	0.17
Cla97C02G044270	19.7033	68.1167	47.8967	133.1		Cla97C01G020810	40.69	66.3467	15.92	42.2767
Cla97C02G047290	3.58333	7.42333	10.5367	26.5967		Cla97C01G024070	67.51	26.6467	203.39	87.73
Cla97C02G047340	33.9467	51.1167	7.11	21.37		Cla97C02G026360	379.13	48.6367	56.59	14.83
Cla97C02G050510	2.80667	0.863333	4.45667	2.09333		Cla97C02G028920	872.74	178.887	6887.78	3056.65
Cla97C03G052420	15.1967	6.43	64.7933	28.5633		Cla97C02G029420	74.8067	31.0833	20.5833	10.7867
Cla97C03G053540	13.7467	31.6933	2.78333	19.4333		Cla97C02G032900	2	7.43333	11.5733	2.28333
Cla97C03G054690	5.75333	27.38	646.92	121.817		Cla97C02G035140	57.8733	14.2433	351.65	133.61
Cla97C03G056340	9.09333	22.3733	39.1967	101.983		Cla97C02G038910	62.4267	113.21	19.21	77.87
Cla97C03G057390	54.61	15.99	338.53	100.973		Cla97C02G040710	159.94	461.447	9.03333	78.8733
Cla97C03G057940	13.4133	23.32	4.34333	11.38		Cla97C02G042020	99.8433	41.8467	46.7733	22.3733
Cla97C03G058280	20.2333	41.4167	1.3	4.65667		Cla97C02G048130	130.433	66.87	45.6933	24.7167
Cla97C03G061230	34.84	15.0033	48.7967	19.57		Cla97C02G048170	4.50333	0.906667	1.19667	0.17
Cla97C03G061760	150.357	937.207	317.573	1503.39		Cla97C03G053570	10.7367	2.33333	3.8	0.543333
Cla97C03G065790	51.79	86.84	16.85	33.9167		Cla97C03G054270	30.1367	11.7367	51.9067	23.8133
Cla97C03G068130	27.7433	76.7467	2.86667	25.7		Cla97C03G061210	986.64	451.443	424.537	103.167
Cla97C04G070450	10.3733	18.2267	5.51333	11.18		Cla97C03G062220	31.62	14.41	11.1433	26.77
Cla97C04G071040	13.5233	4.32	112.907	67.24		Cla97C03G062520	37.0767	23.14	65.7833	43.8
Cla97C04G073570	30.2033	24.4267	91.3867	34.4167		Cla97C03G064510	74.6633	99.7667	33.5267	81.7467
Cla97C04G075280	4.20333	2.32667	8.05667	3.85667		Cla97C03G067040	13.6567	30.96	25.29	61.4267
Cla97C04G075580	18.9867	72.0167	3.53667	21.1767		Cla97C04G073570	19.1867	10.9633	42.8867	19.87
Cla97C04G075710	36.73	18.63	0.32	2.51667		Cla97C04G076250	5.61667	8.03333	3.79667	6.68667
Cla97C04G075860	13.97	4.37667	27.6133	18.2367		Cla97C04G076280	10.64	3.98667	3.75	1.21667
Cla97C04G076820	7.68333	3.27	25.82	8.8		Cla97C05G083240	0.82	13.2767	5.4	41.4067
Cla97C05G080540	22.37	35.0833	7.79667	18.1267		Cla97C05G083310	3.03	5.65333	0.776667	3.04667
Cla97C05G083230	44.5667	4.69333	82.94	22.81		Cla97C05G086730	17.16	7.04667	92.5433	35.21
Cla97C05G083260	42.25	80	830.977	213.137		Cla97C05G086740	10.5133	2.82667	1467.57	118.61
Cla97C05G088300	12.37	116.873	1.91667	10.7833		Cla97C05G088790	7.86333	2.32333	1.65333	0.0666667
Cla97C05G088780	72.35	301.673	8.76667	90.6633		Cla97C05G092600	26.97	3.28	49.4467	12.1433
Cla97C05G090750	10.1233	3.23333	36.62	21.7567		Cla97C05G093330	794.4	1826.94	329.797	1083.76
Cla97C05G092040	196.803	935.557	2.44667	114.917		Cla97C05G094550	3.70667	8.52333	2.17333	4.89
Cla97C05G092860	45.9333	83.1033	13.7367	30.96		Cla97C05G101110	3.91	1.00667	1.45667	0.3
Cla97C05G094190	2.69667	10.6867	7.71667	23.33		Cla97C05G104650	27.09	56.3633	3.09667	24.7033
Cla97C05G096440	11.1867	29.22	31.1433	74.9133		Cla97C05G106570	3.53	6.95	8.52667	19.9167
Cla97C05G101700	12.6567	4.84333	36.17	18.8433		Cla97C05G106860	9.25667	15.24	2.94667	9.28333
Cla97C05G103270	263.767	179.69	336.07	264.91		Cla97C06G109400	32.43	75.73	5.75333	20.9167
Cla97C05G106850	122.517	76.1067	78.66	48.8167		Cla97C06G112140	16.35	6.36333	0.31	1.35
Cla97C05G107020	29.76	83.32	10.3033	27.2433		Cla97C06G113910	11.5733	5.54333	84.7733	13.2533
Cla97C06G112050	53.34	114.097	0	1.55333		Cla97C06G114170	5.58	7.95667	267.083	38.8333
Cla97C06G113940	51.4133	131.047	8.16	26.1567		Cla97C06G116900	5.36333	1.42333	0.766667	0.103333
Cla97C06G115890	0.59	5.55333	35.7033	68.5167		Cla97C06G117370	212.233	279.65	74.68	135.377
Cla97C06G116860	58.1067	25.2767	75.86	48.97		Cla97C06G118400	33.2367	16.32	18.2167	11.06
Cla97C06G119530	10.6933	37.7633	27.1467	14.4		Cla97C06G119080	17.14	56.95	8.77333	37.0333
Cla97C06G120340	183.293	303.34	63.89	142.733		Cla97C06G119290	4.1	8.89667	1.41	5.28333
Cla97C06G120350	449.853	1775.04	137.92	270.867		Cla97C06G122850	107.187	63.4733	70.8067	54.1967
Cla97C06G123400	34.74	92.83	0.926667	3.52667		Cla97C06G125240	16.46	7.86667	44.6367	20.4133
Cla97C06G124080	17.5533	9.08667	36.36	21.6267		Cla97C06G127570	7.62667	18.2467	185.847	60.1633
Cla97C07G128370	92.5033	43.4533	147.907	84.34		Cla97C07G129480	3.45667	1.19	8.94	3.57333
Cla97C07G130770	20.94	55.14	6.01	18.5533		Cla97C07G129710	23.0767	13.1567	56.8933	30.32
Cla97C07G133720	21.78	130.053	3.97667	15.8367		Cla97C07G133090	6.71	3.55333	3.94	1.40667
Cla97C07G136210	118.017	308.023	6.52667	52.0033		Cla97C07G133220	28.1267	12.18	203.977	83.9
Cla97C07G137540	15.2	39.6	34.2167	76.9667		Cla97C07G133580	129.697	352.7	46.2333	131.203
Cla97C07G138170	5.34667	17.03	1.82667	7.37		Cla97C07G135250	13.78	46.54	6.91333	33.1967
Cla97C07G139720	106.1	60.5167	256.377	122.447		Cla97C07G139690	99.69	181.18	21.21	69.4067
Cla97C08G145610	9.18	5.5	18.14	2.89333		Cla97C07G140230	36.79	64.66	20.3767	48.9167
Cla97C08G145670	26.5	57.0767	8.47667	28.3767		Cla97C08G144570	2.77333	15.9833	0.283333	2.80333
Cla97C08G146000	7.06667	20.7667	28.0167	82.48		Cla97C08G147580	10.3333	15.4833	37.2067	25.06
Cla97C08G149140	1.2	3.59333	3.73	10.93		Cla97C08G148100	40.5433	64.1433	152.597	101.697
Cla97C08G151560	5.04333	19.8967	0.31	3.22333		Cla97C08G152460	0.256667	1.31667	1.39	4.1
Cla97C08G151810	9.79	16.8833	185.02	74.93		Cla97C08G152470	0.563333	9.89333	0.0333333	3.72333
Cla97C08G152260	3.10667	7.72667	7.27667	14.9333		Cla97C08G152740	110.203	662.623	21.4967	332.893
Cla97C08G152750	152.29	428.093	55.14	175.25		Cla97C08G153230	18.6167	9.87333	5.71	2.97667
Cla97C08G154780	4.23	18.42	340.303	109.83		Cla97C08G154450	106.347	38.9733	37.1067	21.36
Cla97C08G155430	4.87667	13.7633	0.543333	2.68		Cla97C08G155680	4.98667	1.44333	21.0033	7.85
Cla97C08G155640	9.97667	25.3133	43	155.667		Cla97C08G156510	21.2633	62.5233	7.62	30.8033
Cla97C08G159250	0.15	3.02333	286.61	66.47		Cla97C08G156670	7.59667	2.27667	2.54	0.98
Cla97C08G159420	141.87	1081.74	29.02	263.08		Cla97C08G159500	31.08	9.68333	11.4367	4.13667
Cla97C08G160480	3.75	18.5533	593.633	168.66		Cla97C08G160640	37.4267	14.06	11.71	3.27667
Cla97C08G161100	15.4367	52.4333	0.163333	1.83667		Cla97C09G162240	24.01	66.22	4.99333	39.8833
Cla97C09G162480	76.45	58.43	84.3133	69.0533		Cla97C09G163660	33.62	52.3267	19.5367	37.73
Cla97C09G162840	47.4667	26.26	90.5533	44.1767		Cla97C09G167170	51.0433	15.0033	16.6833	2.05
Cla97C09G166440	137.617	284.187	9.05667	46.3867		Cla97C09G172140	6.02667	1.16	1.16	0.09
Cla97C09G168740	32.2267	62	14.4167	34.4667		Cla97C09G174040	7.42	23.59	21.3533	54.4767
Cla97C09G171810	2.52667	8.08	0.923333	2.61		Cla97C09G175800	657.31	1.20667	228.993	73.37
Cla97C09G174040	6.56667	13.9767	2.19333	5.29		Cla97C09G176250	76.4767	109.773	16.9333	56.23
Cla97C09G176160	261.63	151.16	110.957	70.48		Cla97C09G177590	17.58	8.89	148.07	67.0067
Cla97C09G176620	203.503	466.727	0.94	16.2633		Cla97C09G177880	20.74	33.98	38.3033	73.46
Cla97C09G178060	30.9133	323.757	6.33667	54.7333		Cla97C09G179590	23.6567	35.28	104.283	66.21
Cla97C09G179140	72.03	40.99	337.25	158.837		Cla97C09G181810	8.07333	24.29	16.3067	48.8333
Cla97C09G180000	0.826667	3.31	0.17	1.08333		Cla97C10G184710	1.37	7.62667	86.2033	13.4467
Cla97C09G182830	5.67333	2.48667	38.6467	12.8633		Cla97C10G187290	38.2233	16.5667	231.227	86.84
Cla97C10G185400	4.97333	22.2967	250.667	52.4267		Cla97C10G187400	396.193	136.33	34.0233	1.72333
Cla97C10G186480	58.5867	23.93	23.5633	8		Cla97C10G188210	5.78667	2.41333	2.07667	0.436667
Cla97C10G187470	2.61	24.8433	12.3233	133.213		Cla97C10G190260	1.09333	11.3367	0.0633333	1.31667
Cla97C10G188950	3.69667	12.14	18.73	56.8967		Cla97C10G191340	149.21	582.327	37.3567	157.187
Cla97C10G189410	70.4567	42.9267	150.97	97.73		Cla97C10G191480	22.3833	46.6233	6.06333	30.3233
Cla97C10G191060	24.9867	14.21	72.2	30.2767		Cla97C10G192070	24.58	38.2333	66.3567	33.08
Cla97C10G195300	7.82	21.83	1.94667	10.51		Cla97C10G194210	64.86	34.2533	238.07	100.737
Cla97C10G195350	56.0467	24.25	21.0333	11.31		Cla97C10G195740	26.53	43.3833	345.05	122.61
Cla97C10G195670	83.5433	170.983	18.6467	38.5233		Cla97C10G198010	214.41	112.417	929.887	286.667
Cla97C10G195840	21.87	69.1033	6.57333	19.9033		Cla97C10G198800	134.343	59.33	1959.86	380.407
Cla97C10G197300	40.8667	8.66	11.13	2.65667		Cla97C10G201530	23.0967	5.03	6.70333	0.453333
Cla97C10G197800	27.9533	159.947	90.8633	386.333		Cla97C10G201600	9.05667	0.476667	0.973333	0.02
Cla97C10G197810	8.58	12.2333	7.94667	23.5533		Cla97C10G202860	10.5467	2.01333	29.6667	8.60667
Cla97C10G200940	29.59	9.42333	10.8633	4.26		Cla97C10G203490	10.7867	4.13	208.643	37.6333
Cla97C10G202330	68.3167	139.04	34.79	79.59		Cla97C10G206240	649.903	1257.81	79.8467	777.447
Cla97C10G206230	86.28	158.733	8.17333	24.3433		Cla97C11G206570	253.42	414.307	131.17	339.893
Cla97C11G206680	4.22667	0.0933333	50.4133	1.17		Cla97C11G208660	27.81	8.4	8.03667	3.12333
Cla97C11G207670	6.48667	74.9733	1.3	15.82		Cla97C11G214550	21.52	11.6367	95.0933	35.1833
Cla97C11G211920	37.7367	61.6733	12.5467	31.8367		Cla97C11G215390	344.827	718.917	513.207	1515.09
Cla97C11G214540	3.00333	11.3067	8.36667	27.21		Cla97C11G215780	31.4067	6.53667	8.14667	4.53
Cla97C11G215570	57.22	34.31	116.563	44.1733		Cla97C11G216570	90.2167	391.743	20.0367	205.42
Cla97C11G217860	125.987	246.63	50.2667	111.823		Cla97C11G216650	8.59333	2.78667	2.59	0.983333
Cla97C11G222470	107.763	65.07	406.37	187.793		Cla97C11G219620	18.4367	57.4	6.70333	22.2867
Cla97C11G222980	9.77667	16.1633	4.68333	9.55333		Cla97C11G219690	0.833333	3.48	5.25333	49.8167
Cla97C11G224300	8.69	17.0233	31.5533	72.6633		Cla97C11G220850	17.34	31.8767	241.977	75.38
						Cla97C11G223950	10.77	3.49	79.9167	22.17
