# Supplementary material for: Comparative Transcriptome Profiling Provides Insights into Plant Salt Tolerance in Watermelon (Citrullus lanatus)
Source: Life (Basel). 2022 Jul 12;12(7):1033. doi: 10.3390/life12071033 (PMC9320501; doi:10.3390/life12071033)
Supplement: Supplementary file 1 [file life-12-01033-s001.zip › supplementary table S4.xls]

## Sheet: Sheet1
Table S4.Correlation coefficient between TFs and DEGs in roots.
TFs	BGI_novel_G000299	Cla97C06G123400	Cla97C01G016350	Cla97C07G133720	Cla97C07G138170	Cla97C09G182830	Cla97C08G159250	Cla97C08G159420	Cla97C02G047340	Cla97C04G075580	Cla97C04G075860	Cla97C06G120340	Cla97C06G120350	Cla97C08G151810	Cla97C08G161100	Cla97C10G195840	Cla97C11G214540							Cla97C02G047340(PAL)
Cla97C03G057940	-0.275	0.375	-0.656	-0.421	0.038	-0.605	-0.788	-0.538	0.944	0.887	0.655	0.904	-0.682	-0.78	0.629	-0.757	-0.376							Cla97C04G075860(PAL)
Cla97C08G149140	.999**	-.998**	-0.503	-0.701	0.926	0.949	0.835	0.867	-0.616	-0.003	0.504	-0.69	-0.472	0.844	-0.936	-0.363	.998**							Cla97C08G161100(HCT)
Cla97C08G155430	-0.903	0.941	0.138	0.41	-0.708	-.993**	-.970*	-0.859	0.865	0.389	-0.138	0.914	0.104	-.979*	.999**	0.001	-0.943							Cla97C10G195840(CCR)
Cla97C08G155640	.989*	-.970*	-0.654	-0.809	.980*	0.873	0.719	0.814	-0.458	0.183	0.656	-0.541	-0.627	0.728	-0.853	-0.525	.969*							Cla97C04G075580(PER)
Cla97C09G174040	-.983*	.997**	0.392	0.602	-0.88	-.979*	-0.898	-0.912	0.707	0.102	-0.394	0.769	0.359	-0.902	.968*	0.241	-.996**							Cla97C06G120340(PER)
