# Supplementary material for: Comparative Transcriptome Profiling Provides Insights into Plant Salt Tolerance in Watermelon (Citrullus lanatus)
Source: Life (Basel). 2022 Jul 12;12(7):1033. doi: 10.3390/life12071033 (PMC9320501; doi:10.3390/life12071033)
Supplement: Supplementary file 1 [file life-12-01033-s001.zip › supplementary table S5.xls]

## Sheet: Sheet1
Table S5.Correlation coefficient between TFs and DEGs in leaves.
TFs	BGI_novel_G000297	Cla97C10G187290	Cla97C03G054270	Cla97C10G198010	Cla97C11G219620	Cla97C03G067040	Cla97C05G101110	Cla97C07G133220	Cla97C07G139690	Cla97C06G119080	Cla97C03G053570	Cla97C11G219690	Cla97C08G154450	Cla97C10G202860
Cla97C01G012490	-0.324	-0.914	.965*	-0.234	-0.856	-.993**	.996**	-0.944	0.592	-.997**	.996**	-.992**	0.942	0.582
Cla97C05G106570	0.415	.953*	-.991**	0.323	0.865	1.000**	-.998**	.973*	-0.673	.985*	-.991**	.984*	-.973*	-0.679
Cla97C06G112140	-0.925	-0.903	0.8	-0.882	-0.87	-0.728	0.687	-0.868	.996**	-0.609	0.629	-0.596	0.868	0.947
Cla97C06G113910	0.923	0.335	-0.145	.956*	0.383	0.032	0.027	0.264	-0.76	-0.128	0.103	-0.146	-0.264	-0.679
Cla97C07G133580	0.355	-0.406	0.58	0.454	-0.18	-0.632	0.671	-0.456	-0.06	-0.716	0.72	-0.75	0.463	0.095
Cla97C08G155680	0.476	.971*	-.998**	0.385	0.874	.997**	-.991**	.986*	-0.722	.970*	-.978*	.969*	-.986*	-0.732
Cla97C09G174040	0.602	.996**	-.991**	0.52	0.921	.976*	-.961*	1.000**	-0.816	0.927	-0.937	0.922	-1.000**	-0.804
Cla97C10G201530	-0.202	-0.861	0.941	-0.105	-0.766	-.975*	.987*	-0.897	0.491	-.997**	.996**	-.999**	0.897	0.514
Cla97C10G206240	-0.855	-0.19	-0.004	-0.901	-0.245	0.119	-0.177	-0.116	0.655	0.276	-0.252	0.293	0.117	0.578
Cla97C11G208660	-0.499	-.977*	.998**	-0.41	-0.887	-.995**	.987*	-.990*	0.74	-.965*	.973*	-.963*	.990**	0.744
