# Supplementary figures and images for: Comparative Transcriptome Profiling Provides Insights into Plant Salt Tolerance in Watermelon (Citrullus lanatus)
Source: MDPI journal article supplement (doi:10.3390/life12071033), 2022-07-12

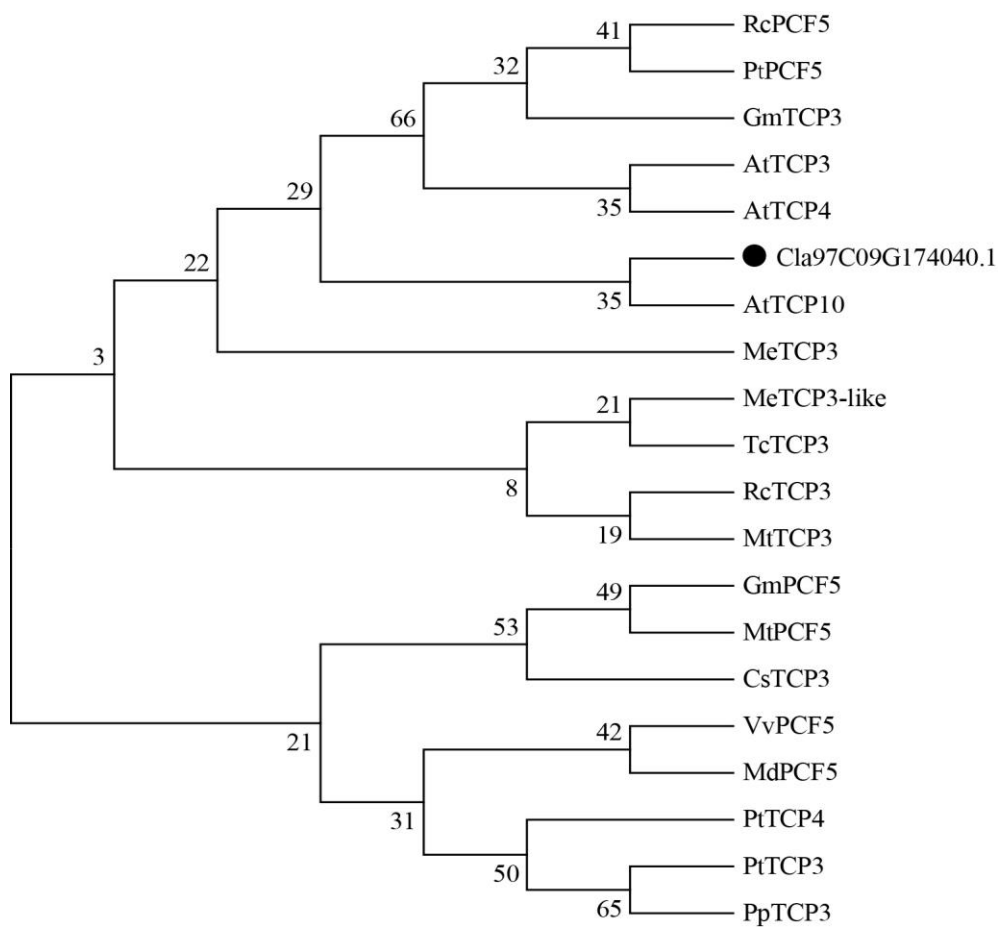

Figure S2. Phylogenetic tree of TCPs.

Supplement: s1 [file s1]

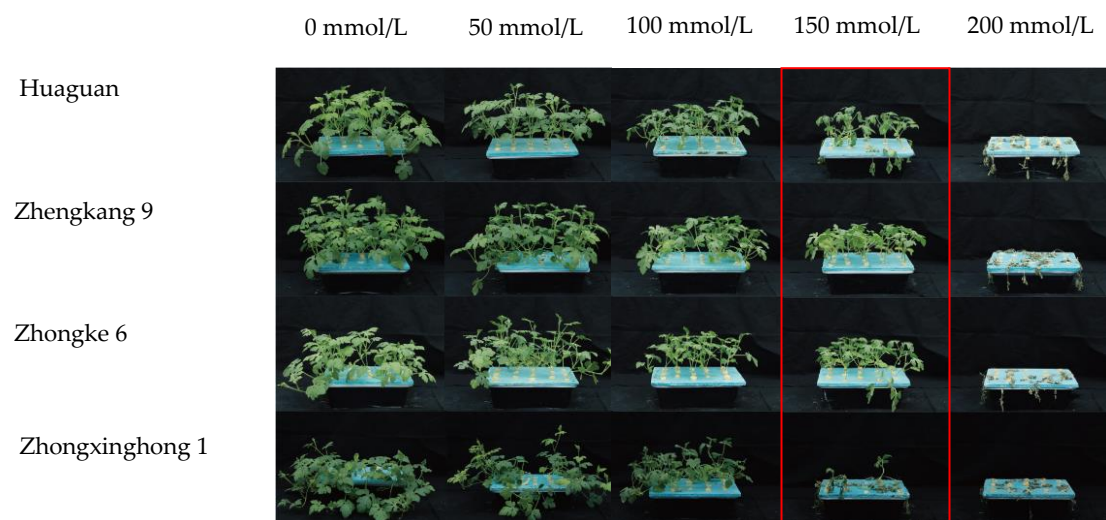

Figure S1. The salt tolerance of the different salt concentrations.

Supplement: s1 [file s1]
